# Supplementary material for: Achalasia—An Autoimmune Inflammatory Disease: A Cross-Sectional Study
Source: Hindawi journal article supplement (doi:10.1155/2015/729217), 2015-01-01
Supplement: f1 [file 729217.f1.pdf]

## Supplementary Materials

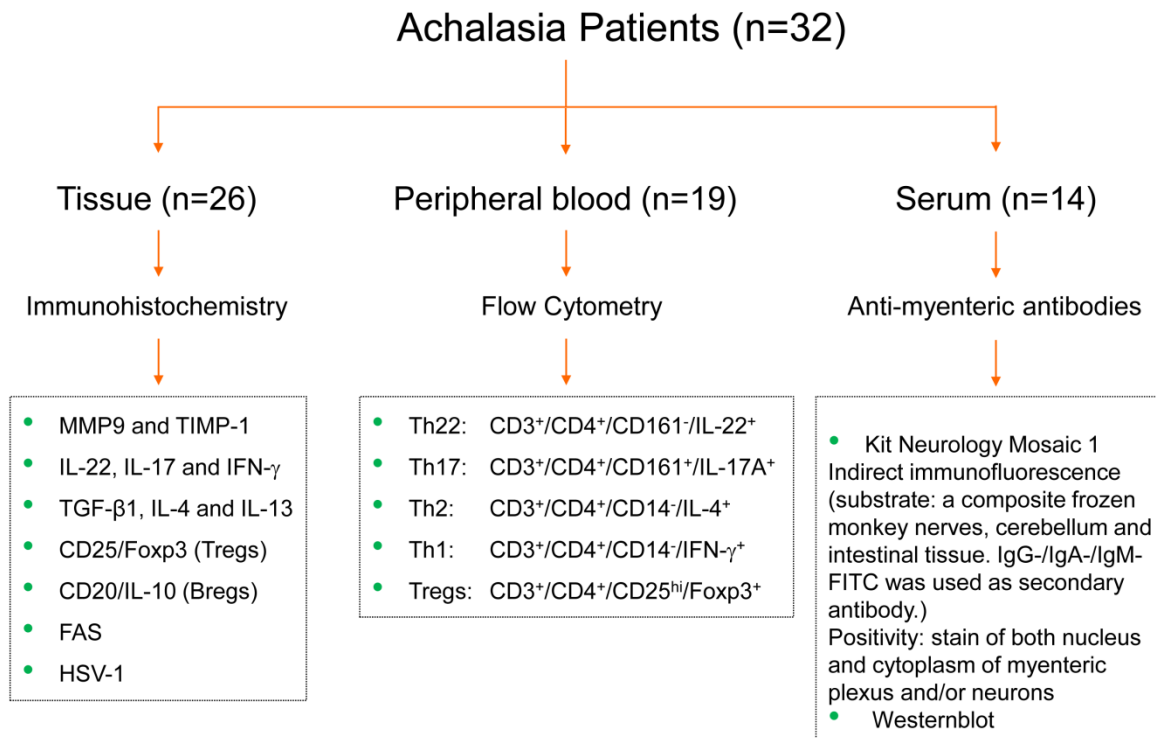

Statistical Analysis: One Way Analysis of Variance on Ranks. Holm-Sidak Method

**Figure S1**
